# Supplementary material for: Fe3N-decorated porous carbon frameworks from wheat flour with dual enzyme-mimicking activities for organic pollutant degradation
Source: Royal Society of Chemistry journal article supplement (doi:10.1039/d3nr00048f), 2023-01-01
Supplement: d3nr00048f2.pdf [file d3nr00048f2.pdf]

## Supporting Information

### **Fe<sub>3</sub>N Decorated Porous Carbon Frameworks from Wheat Flour with Dual Enzyme-mimicking Activities for Organic Pollutants Degradation**

Qi Fang,<sup>a,b</sup> Quanyi Liu,<sup>a,b</sup> Yu Zhang<sup>a,b</sup> and Yan Du<sup>\*a,b</sup>

<sup>a</sup> State Key Laboratory of Electroanalytical Chemistry, Changchun Institute of Applied Chemistry, Chinese Academy of Sciences, Changchun, Jilin 130022, P. R. China

<sup>b</sup> School of Applied Chemistry and Engineering, University of Science & Technology of China, Hefei, Anhui 230026, China

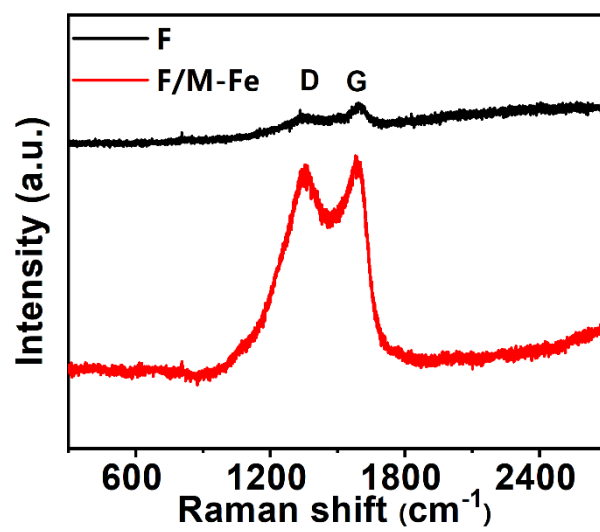

**Figure S1.** Raman spectra of F and F/M-Fe.

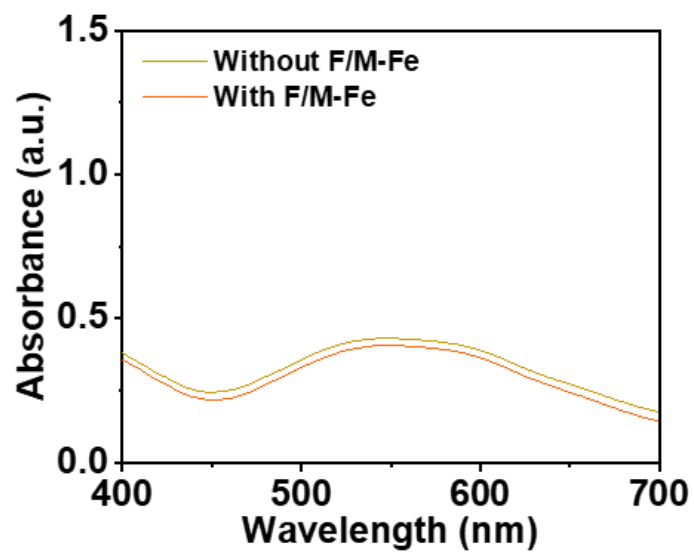

**Figure S2.** SOD-like activity assay of F/M-Fe using NBT probe as indicator.

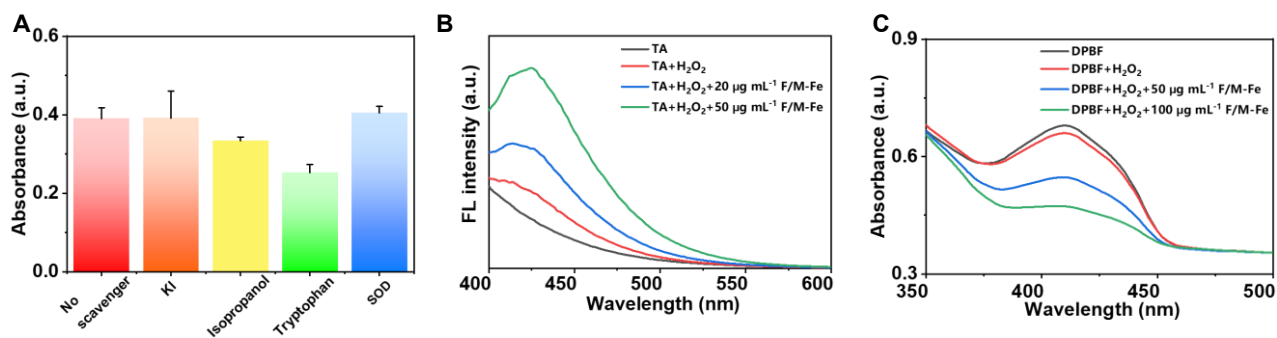

**Figure S3.** (A) Effect of different scavengers on the catalytic oxidation of TMB by F/M-Fe. (B) Fluorescence spectra of produced hydroxyl radicals ( $\cdot\text{OH}$ ) by using TA assay. (C) UV-Vis absorption spectra of produced singlet oxygen ( $^1\text{O}_2$ ) by using DPBF assay.

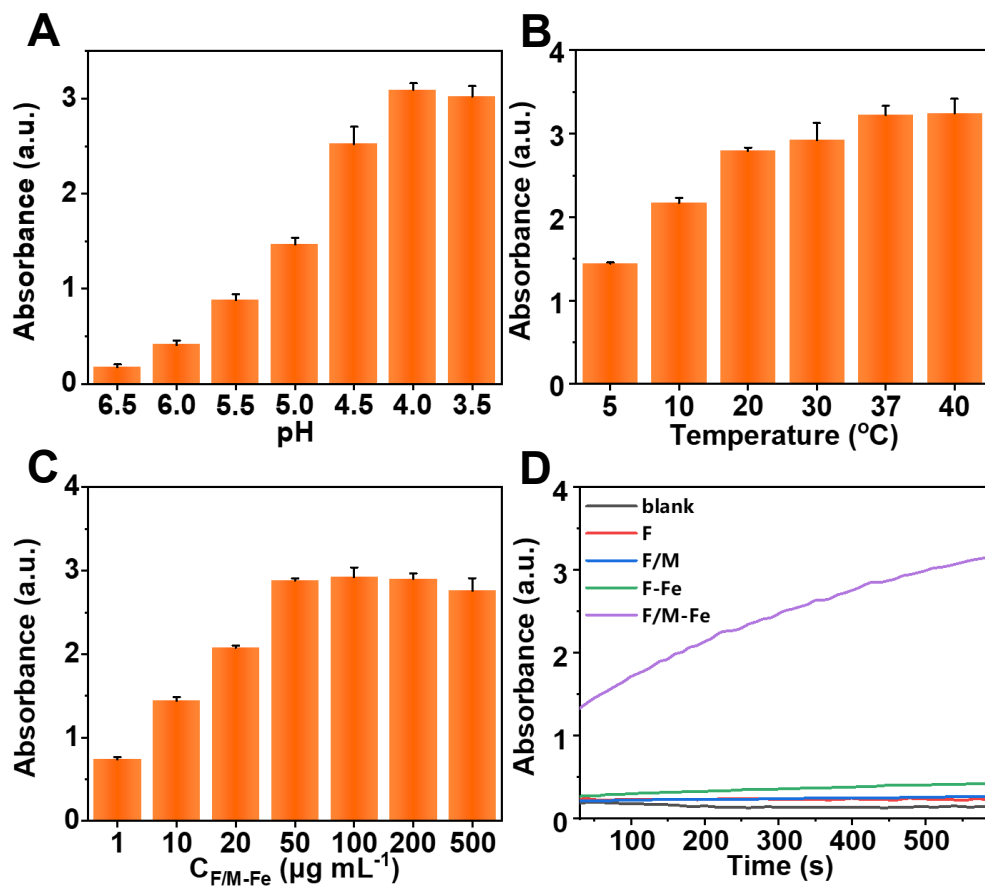

**Figure S4.** The optimization for (A) pH, (B) temperature and (C) the concentration of F/M-Fe. (D) Time-dependent absorbance of TMB at 652 nm with carbon-based nanozymes.

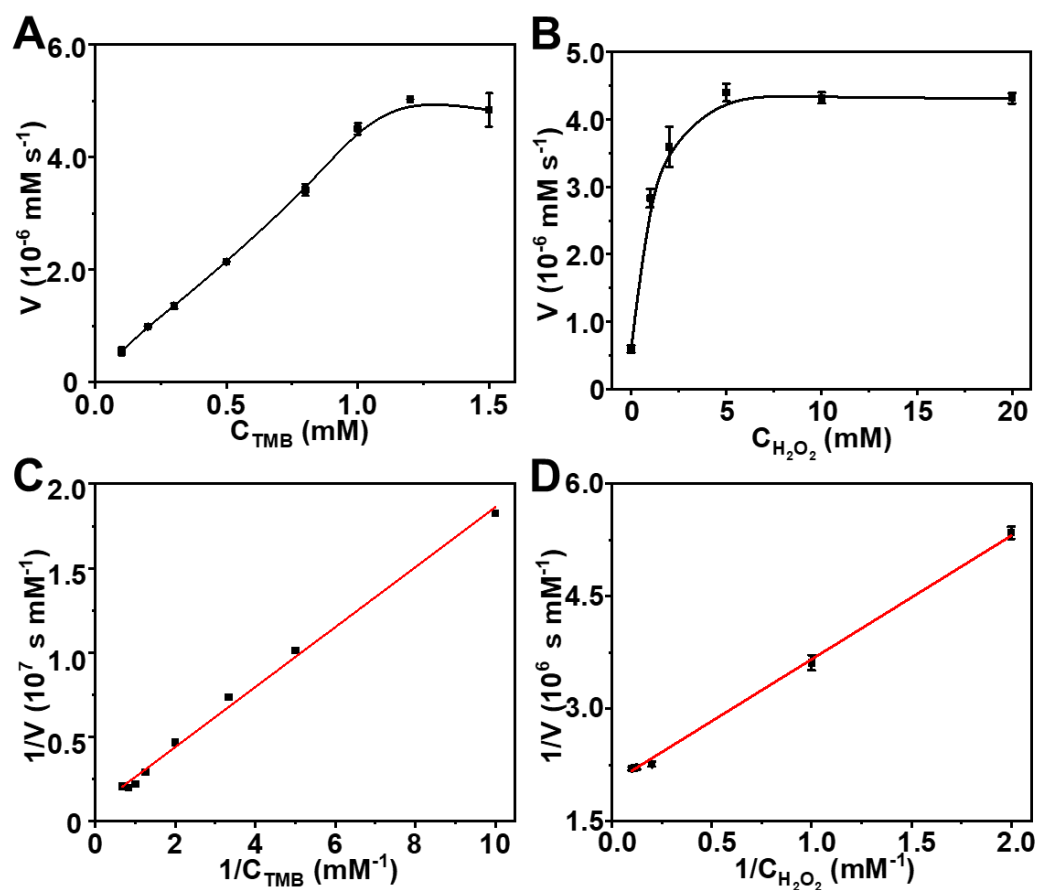

**Figure S5.** Steady-state kinetic study of the reaction between TMB and H<sub>2</sub>O<sub>2</sub> catalyzed by F/M-Fe. The well-fitted Michaelis-Menten curve while varying the concentrations of (A) TMB (0.1, 0.2, 0.3, 0.5, 0.8, 1, 1.2, 1.5 mM) and (B) H<sub>2</sub>O<sub>2</sub> (0, 0.5, 1, 2, 5, 8, 10, 20 mM). (C-D) The double reciprocal plots obtained from (A) and (B).

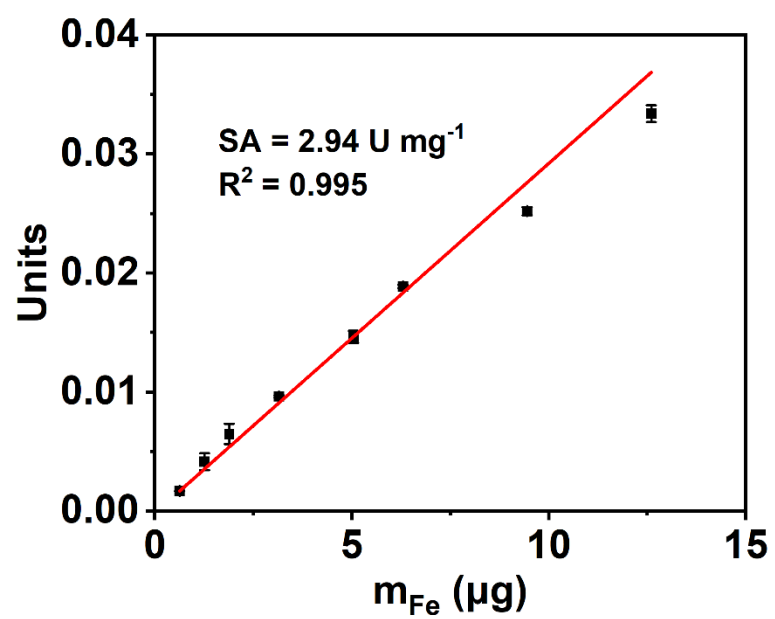

Figure S6. The specific activity value of F/M-Fe.  $m_{\text{Fe}}$  is mass of Fe in F/M-Fe.

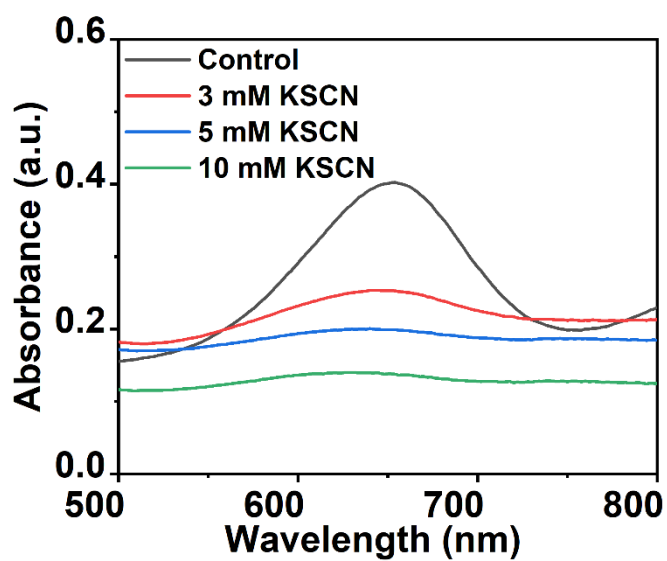

**Figure S7.** UV-vis absorption spectra of  $\text{H}_2\text{O}_2/\text{TMB}/\text{F/M-Fe}$  solution upon the addition of various concentrations of KSCN.



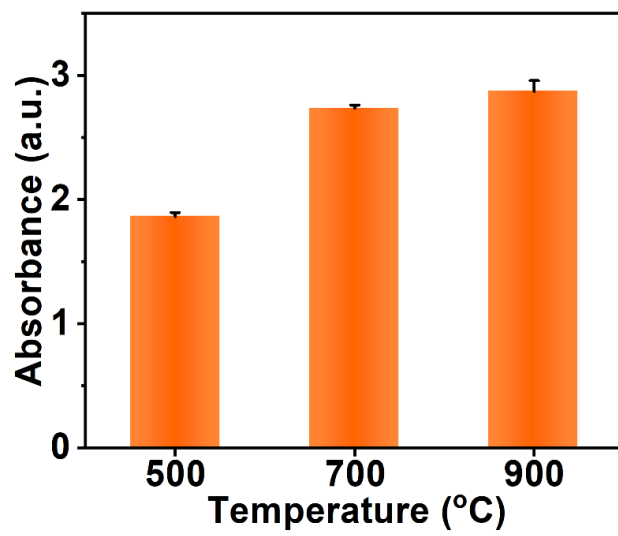

**Figure S8.** Optimization of the calcination temperature during pyrolysis.

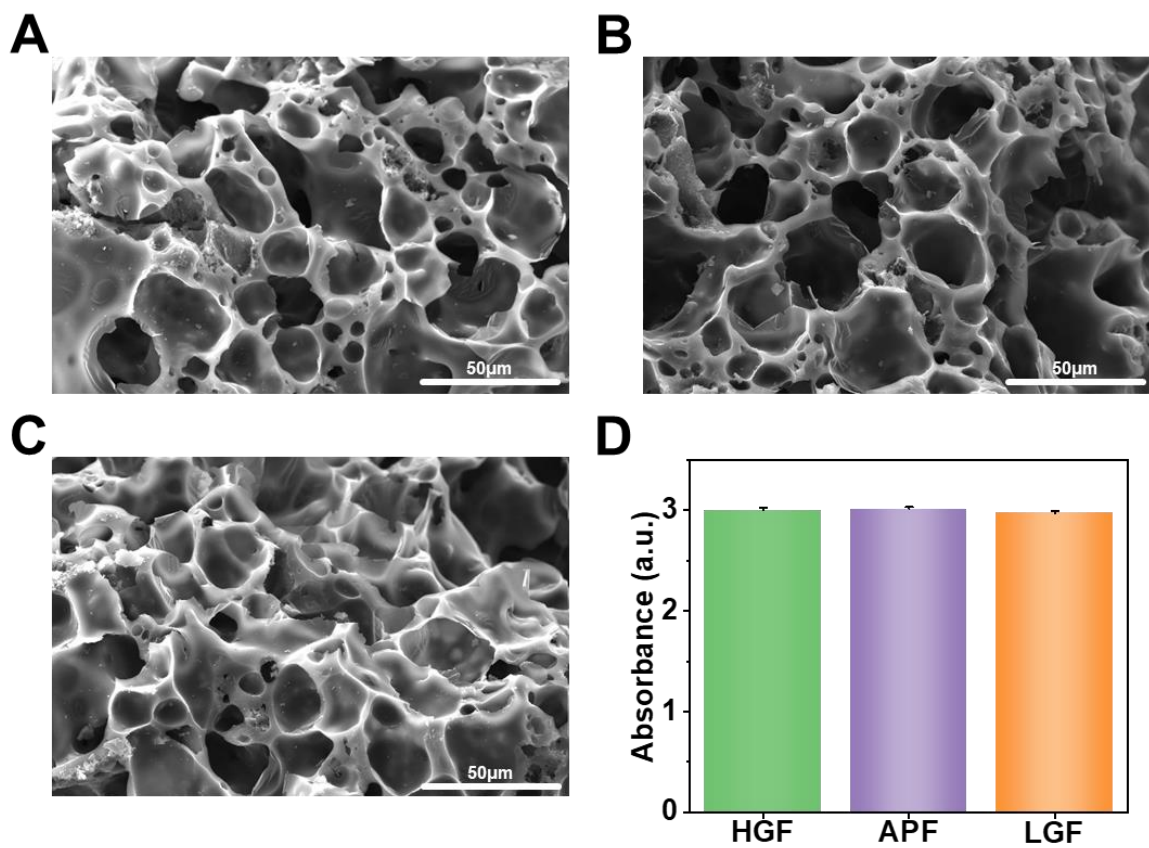

**Figure S9.** The SEM images of F/M-Fe with different types of wheat flour as precursors: (A) high-gluten flour (HGF); (B) all-purpose flour (APF); (C) low-gluten flour (LGF), and (D) the comparison for the respective peroxidase-like activity of each sample.

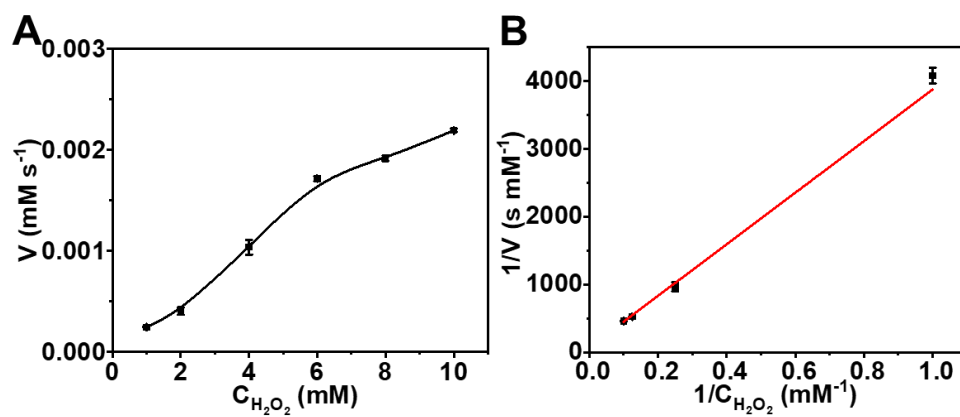

**Figure S10.** (A) Michaelis-Menten curve fit and (B) Lineweaver-Burk double reciprocal plot of CAT-like activity of F/M-Fe.

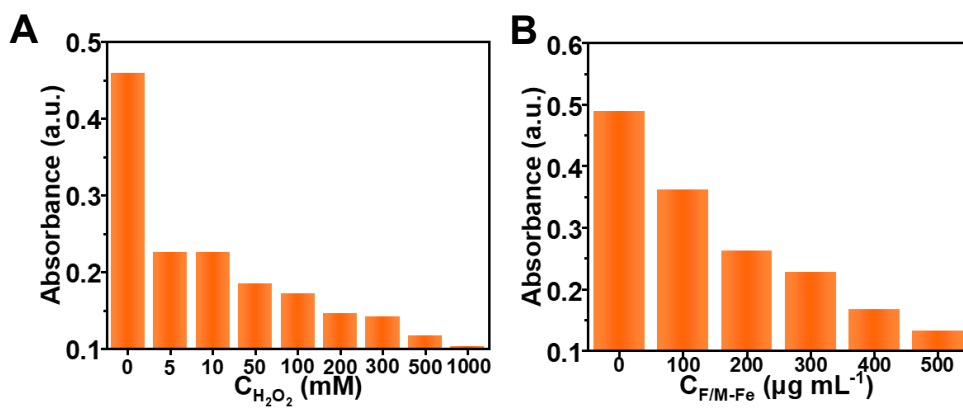

**Figure S11.** Optimization for the concentration of H<sub>2</sub>O<sub>2</sub> (A) and F/M-Fe (B) for MB degradation.

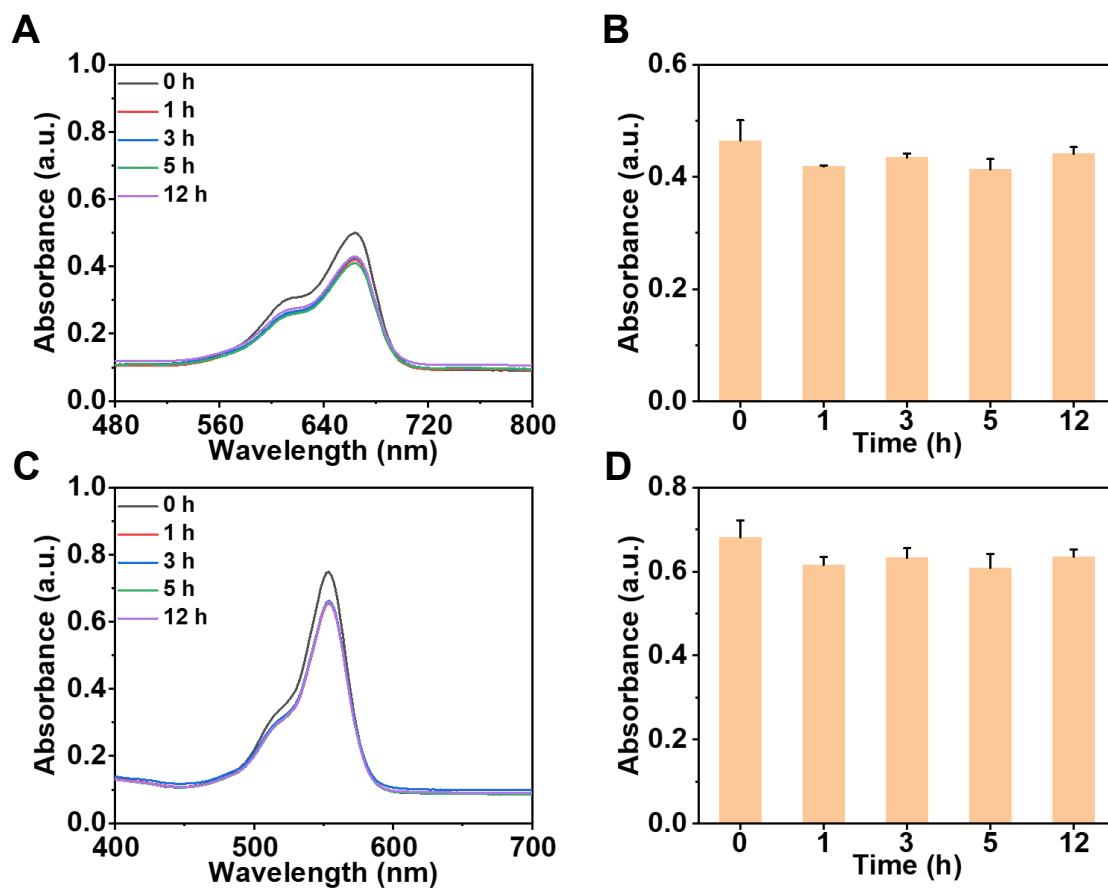

**Figure S12.** (A) UV-vis absorption spectra of MB subjected to F/M-Fe with different incubation time; (B) Comparison of the absorbance at 664 nm of MB; (C) UV-vis absorption spectra of RhB subjected to F/M-Fe with different incubation time; (D) Comparison of the absorbance at 550 nm of RhB.

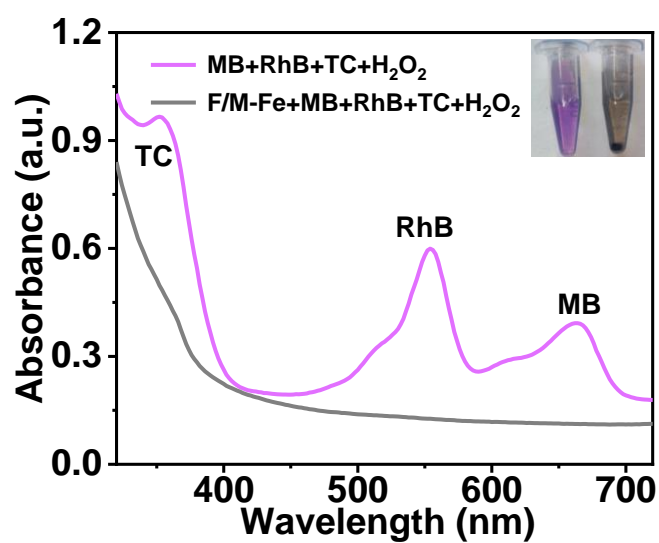

**Figure S13.** UV-Vis spectra of the pollutant mixture solution (10  $\mu\text{M}$  MB + 10  $\mu\text{M}$  RhB + 0.05  $\text{mg mL}^{-1}$  TC) before and after degradation with F/M-Fe in the presence of 1 M  $\text{H}_2\text{O}_2$ . (The inset picture is the color change of mixture solution before and after degradation)

**Table S1.** Comparison of kinetic parameters (POD) of F/M-Fe, HRP and other carbon-based enzyme mimics.

|                                                      | Substance                     | $K_m$ (mM) | $V_{max}$ ( $10^{-8}$ mM/s) | Reference |
|------------------------------------------------------|-------------------------------|------------|-----------------------------|-----------|
| F/M-Fe                                               | TMB                           | 2.07       | 113                         | This work |
|                                                      | H <sub>2</sub> O <sub>2</sub> | 0.82       | 49.7                        |           |
| HRP                                                  | TMB                           | 0.434      | 10                          | 1         |
|                                                      | H <sub>2</sub> O <sub>2</sub> | 3.7        | 8.71                        |           |
| GO-COOH                                              | TMB                           | 0.0237     | 3.45                        | 2         |
|                                                      | H <sub>2</sub> O <sub>2</sub> | 3.99       | 3.85                        |           |
| CQDs                                                 | TMB                           | 0.039      | 3.61                        | 3         |
|                                                      | H <sub>2</sub> O <sub>2</sub> | 26.77      | 3.06                        |           |
| GQDs                                                 | H <sub>2</sub> O <sub>2</sub> | 0.49       | 2.62                        | 4         |
| Carbon nanohorn                                      | H <sub>2</sub> O <sub>2</sub> | 49.8       | 2.07                        | 5         |
| C <sub>60</sub> [C(COOH) <sub>2</sub> ] <sub>2</sub> | H <sub>2</sub> O <sub>2</sub> | 24.58      | 4.01                        | 6         |

**Table S2.** Comparison for the kinetic parameters (CAT) of F/M-Fe, catalase and other enzyme mimics.

|                           | $K_m$ (mM) | $V_{max}$ (mM/min) | Reference |
|---------------------------|------------|--------------------|-----------|
| F/M-Fe                    | 54.4       | 0.87               | This work |
| Catalase                  | 294.4      | 0.18               | 7         |
| Fe <sup>3+</sup> /AMP CPs | 112.2      | 0.144              |           |
| DMSN@AuPtCo               | 5.9        | 0.34               | 8         |
| L-QDs                     | 432.7      | 0.08               | 9         |
| Fe-SANzyme                | 18.8       | 0.559              | 10        |
| PCNSs                     | 678.9      | 0.007              | 11        |



**Table S3.** Comparison of different catalysts in previous studies and this study.

| Catalyst                                                         | Reaction condition        | Substrate | Degradation efficiency | Time (h) | Reference |
|------------------------------------------------------------------|---------------------------|-----------|------------------------|----------|-----------|
| F/M-Fe                                                           | \                         | MB        | 99.72%                 | 1        | This work |
|                                                                  |                           | RhB       | 93.43%                 | 1        |           |
|                                                                  |                           | TC        | 82.01%                 | 1        |           |
| V <sub>2</sub> O <sub>5</sub> /g-C <sub>3</sub> N <sub>4</sub>   | Visible light irradiation | RhB       | 95.5%                  | 1        | 12        |
|                                                                  |                           | TC        | 75.7%                  | 2        |           |
| CuCr <sub>2</sub> O <sub>4</sub> /CeO <sub>2</sub>               | \                         | MB        | 99%                    | 0.75     | 13        |
|                                                                  |                           | RhB       | 85%                    | 0.75     |           |
| Bi <sub>2</sub> WO <sub>6</sub> /Nb <sub>2</sub> CT <sub>x</sub> | Visible light irradiation | MB        | 92.7%                  | 1.5      | 14        |
|                                                                  |                           | RhB       | 99.8%                  | 1.5      |           |
|                                                                  |                           | TC        | 83.1%                  | 2        |           |
| ZnO <sub>2</sub> /Fe <sup>3+</sup>                               | \                         | TC        | 90%                    | 1        | 15        |
| GOQD-MPS                                                         | \                         | RhB       | 92%                    | 6        | 16        |

## Reference

1. L. Gao, J. Zhuang, L. Nie, J. Zhang, Y. Zhang, N. Gu, T. Wang, J. Feng, D. Yang, S. Perrett and X. Yan, *Nat. Nanotechnol.*, 2007, **2**, 577-583.
2. Y. J. Song, K. G. Qu, C. Zhao, J. S. Ren and X. G. Qu, *Adv. Mater.*, 2010, **22**, 2206-2210.
3. W. B. Shi, Q. L. Wang, Y. J. Long, Z. L. Cheng, S. H. Chen, H. Z. Zheng and Y. M. Huang, *Chem. Commun.*, 2011, **47**, 6695-6697.
4. Y. Zhang, C. Y. Wu, X. J. Zhou, X. C. Wu, Y. Q. Yang, H. X. Wu, S. W. Guo and J. Y. Zhang, *Nanoscale*, 2013, **5**, 1816-1819.
5. E. L. G. Samuel, D. C. Marcano, V. Berka, B. R. Bitner, G. Wu, A. Potter, R. H. Fabian, R. G. Pautler, T. A. Kent, A. L. Tsai and J. M. Tour, *Proc. Natl. Acad. Sci. U. S. A.*, 2015, **112**, 2343-2348.
6. R. Li, M. Zhen, M. Guan, D. Chen, G. Zhang, J. Ge, P. Gong, C. Wang and C. Shu, *Biosens Bioelectron*, 2013, **47**, 502-507.
7. M. Z. Jiao, Z. J. Li, X. L. Li, Z. J. Zhang, Q. P. Yuan, F. Vriesekoop, H. Liang and J. W. Liu, *Chem. Eng. J.*, 2020, **388**, 9.
8. F. M. Wang, Y. Zhang, Z. W. Liu, J. S. Ren and X. G. Qu, *Nanoscale*, 2020, **12**, 14465-14471.
9. Q. F. Li, Y. L. Gao, J. Shen, X. Y. Mu, J. Y. Wang, L. F. Ouyang, K. Chen, H. He, J. H. Pei, Q. J. Ren, S. Sun, H. L. Liu, L. Zhou, Y. M. Sun, W. Long, J. N. Zhang and X. D. Zhang, *Mater. Today Commun.*, 2021, **27**, 102286.
10. R. Zhang, B. Xue, Y. Tao, H. Zhao, Z. Zhang, X. Wang, X. Zhou, B. Jiang, Z. Yang, X. Yan and K. Fan, *Adv Mater*, 2022, **34**, e2205324.
11. K. Fan, J. Xi, L. Fan, P. Wang, C. Zhu, Y. Tang, X. Xu, M. Liang, B. Jiang, X. Yan and L. Gao, *Nat Commun*, 2018, **9**, 1440.
12. Y. Z. Hong, Y. H. Jiang, C. S. Li, W. Q. Fan, X. Yan, M. Yan and W. D. Shi, *Appl. Catal. B-Environ.*, 2016, **180**, 663-673.
13. K. Ghorai, A. Panda, M. Bhattacharjee, D. Mandal, A. Hossain, P. Bera, M. M. Seikh and A. Gayen, *Appl. Surf. Sci.*, 2021, **536**, 147604.
14. C. Cui, R. H. Guo, H. Y. Xiao, E. Ren, Q. S. Song, C. Xiang, X. X. Lai, J. W. Lan and S. X. Jiang, *Appl. Surf. Sci.*, 2020, **505**, 144595.
15. P. Chen, F. Z. Sun, W. Wang, F. T. Tan, X. Y. Wang and X. L. Qiao, *J. Alloy. Compd.*, 2020, **834**, 155220.
16. A. Ibarbia, L. Sanchez-Abella, L. Lezama, H. J. Grande and V. Ruiz, *Appl. Surf. Sci.*, 2020, **527**, 146937.
